# Supplementary material for: Development, validation and comparison of multivariable risk scores for prediction of total stroke and stroke types in Chinese adults: a prospective study of 0.5 million adults
Source: Stroke Vasc Neurol. 2022 Mar 15;7(4):328–36. doi: 10.1136/svn-2021-001251 (PMC9453839; doi:10.1136/svn-2021-001251)
Supplement: Supplementary data [file svn-2021-001251supp002.xlsx]

## Sheet: Stroke Risk Calculator
Caution: The models presented in this report should not be used in clinical practice before being validated and refined in independent populations. These procedures are included for reporting transparency and reproducibility purposes only.
Model Selection Options: Use options below to select appropriate stroke risk equation.			Individual Risk Factor Values:			Model Output:
Select Prediction:	9Yr Total Stroke Risk		Risk Factors:	Insert risk factor values for individual in this column		Predicted 9-yr Risk:	0.054063
Select Sex:	Male		Age (yrs)	40
Select Model:	FSRP Inputs (Recalibrated and Refitted - Area-specific CKB Baselines)		Current Smoking (0 for no; 1 for yes)	0
Select Geographic Area:	Harbin (Urban)		History of CHD? (0 for no; 1 for yes)	0
			Has Diabetes? (0 for no; 1 for yes)	0
			Used BP-lowering drugs? (0 for no; 1 for yes)	0
			SBP (in mmHg)	130
			0
			0
			0
			0
			0
			0
			0
			0
			0
			0
			0
			0
			0
			0
			0
			0
			0
			0
			0
			0
			0
			0
			0
			0
			0
			0
			0
			0
			0
			0
			0
			0
			0
			0
			0
			0
			0
			0
			0
			0
			0
			0
			0
			0
			0
			0
			0
			0
			0
			0
			0
			0
			0
			0
			0
			0
			0
			0
			0
			0
			0
			0
			0
			0
			0
			0
			0
			0
			0
			0
			0

## Sheet: Model Params - HRs
All CKB variables are listed below. Green cells indicate risk factors that are included in a particular model. Red cells indicate risk factors that were not included. Hazard ratios for all selected risk factors are reported in the following tables.
Total Stroke
Hazard Ratios (Male)	Age (10 yrs)	Current Smoking	CHD	Age 65+	DM, if Age<65	DM, if Age 65+	HTN Rx	SBP per 10 mmHg, if no HRx	SBP per 10 mmHg, if HRx	region_is_urban	sbp_mean	has_diabetes	household_size	has_health_cover	years_since_quitting_smoking	has_copd	hypertension_diag	rheum_heart_dis_diag	tb_diag	cirrhosis_hep_diag	peptic_ulcer_diag	gall_diag	asthma_diag	kidney_dis_diag	fracture_diag	rheum_arthritis_diag	neurasthenia_diag	head_injury_diag	cancer_diag	blood_transfusions	children	siblings	mother_still_alive	father_still_alive	mother_stroke	mother_heart_attack	mother_diabetes	mother_cancer	father_stroke	father_diabetes	father_heart_attack	father_cancer	siblings_stroke	siblings_diabetes	siblings_heart_attack	siblings_cancer	children_stroke	children_heart_attack	children_diabetes
2017 FSRP (Uncalibrated)	1.64	1.6	1.57	1.58	3.87	1.41	2.28	1.31	1.1
FSRP Inputs (Recalibrated - Aggregate CKB Baseline)	1.64	1.6	1.57	1.58	3.87	1.41	2.28	1.31	1.1
FSRP Inputs (Recalibrated and Refitted - Aggregate CKB Baseline)	1.95	1.05	1.5	0.96	1.84	1.37	1.72	1.2	1.09
FSRP Inputs (Recalibrated - Area-specific CKB Baselines)	1.64	1.6	1.57	1.58	3.87	1.41	2.28	1.31	1.1
FSRP Inputs (Recalibrated and Refitted - Area-specific CKB Baselines)	2	1.18	1.18	0.87	1.66	1.27	2.01	1.21	1.09
Expanded Model with CKB Inputs	1.81		1.07		1.25		1.6	1.1		1	1.02	1.25	1		1	1.02	1.23		1.02					1.11							1		1.14	1.15	1.13	1.07			1.13			0.92	1.06		1.08				1.03
Hazard Ratios (Female)	Age (10 yrs)	Current Smoking	CHD	Age 65+	DM, if Age<65	DM, if Age 65+	HTN Rx	SBP per 10 mmHg, if no HRx	SBP per 10 mmHg, if HRx	region_is_urban	sbp_mean	has_diabetes	household_size	has_health_cover	years_since_quitting_smoking	has_copd	hypertension_diag	rheum_heart_dis_diag	tb_diag	cirrhosis_hep_diag	peptic_ulcer_diag	gall_diag	asthma_diag	kidney_dis_diag	fracture_diag	rheum_arthritis_diag	neurasthenia_diag	head_injury_diag	cancer_diag	blood_transfusions	children	siblings	mother_still_alive	father_still_alive	mother_stroke	mother_heart_attack	mother_diabetes	mother_cancer	father_stroke	father_diabetes	father_heart_attack	father_cancer	siblings_stroke	siblings_diabetes	siblings_heart_attack	siblings_cancer	children_stroke	children_heart_attack	children_diabetes
2017 FSRP (Uncalibrated)	2.41	1.67	0.97	1.49	2.92	1.07	1.14	1.12	1.19
FSRP Inputs (Recalibrated - Aggregate CKB Baseline)	2.41	1.67	0.97	1.49	2.92	1.07	1.14	1.12	1.19
FSRP Inputs (Recalibrated and Refitted - Aggregate CKB Baseline)	1.97	1.26	1.76	0.88	1.65	1.34	1.59	1.13	1.06
FSRP Inputs (Recalibrated - Area-specific CKB Baselines)	2.41	1.67	0.97	1.49	2.92	1.07	1.14	1.12	1.19
FSRP Inputs (Recalibrated and Refitted - Area-specific CKB Baselines)	2	1.16	1.29	0.79	1.54	1.25	1.78	1.16	1.08
Expanded Model with CKB Inputs	1.77		1.13		1.3		1.44	1.05		1	1.03	1.18	1.01			1.01	1.17	1.37	1	0.99		1.1		1.08	1.05	1.04	1.12	1.16	1.15		1	1	1.11	1.1	1.12				1.12				1.08	1	0.97		1.13		1.13
Ischemic Stroke
Hazard Ratios (Male)	Age (10 yrs)	Current Smoking	CHD	Age 65+	DM, if Age<65	DM, if Age 65+	HTN Rx	SBP per 10 mmHg, if no HRx	SBP per 10 mmHg, if HRx	region_is_urban	sbp_mean	has_diabetes	household_size	has_health_cover	years_since_quitting_smoking	has_copd	hypertension_diag	rheum_heart_dis_diag	tb_diag	cirrhosis_hep_diag	peptic_ulcer_diag	gall_diag	asthma_diag	kidney_dis_diag	fracture_diag	rheum_arthritis_diag	neurasthenia_diag	head_injury_diag	cancer_diag	blood_transfusions	children	siblings	mother_still_alive	father_still_alive	mother_stroke	mother_heart_attack	mother_diabetes	mother_cancer	father_stroke	father_diabetes	father_heart_attack	father_cancer	siblings_stroke	siblings_diabetes	siblings_heart_attack	siblings_cancer	children_stroke	children_heart_attack	children_diabetes
2017 FSRP (Uncalibrated)	1.64	1.6	1.57	1.58	3.87	1.41	2.28	1.31	1.1
FSRP Inputs (Recalibrated - Aggregate CKB Baseline)	1.64	1.6	1.57	1.58	3.87	1.41	2.28	1.31	1.1
FSRP Inputs (Recalibrated and Refitted - Aggregate CKB Baseline)	1.98	1	1.57	0.92	1.98	1.52	1.75	1.17	1.07
FSRP Inputs (Recalibrated - Area-specific CKB Baselines)	1.64	1.6	1.57	1.58	3.87	1.41	2.28	1.31	1.1
FSRP Inputs (Recalibrated and Refitted - Area-specific CKB Baselines)	2.05	1.19	1.18	0.81	1.7	1.34	2.03	1.19	1.07
Expanded Model with CKB Inputs	1.83		1.06		1.26		1.57	1.09		1	1.01	1.28	1	1.26	1	0.98	1.24							1.12				1.1			1		1.15	1.17	1.12				1.14				1.09		1.1				1.04
Hazard Ratios (Female)	Age (10 yrs)	Current Smoking	CHD	Age 65+	DM, if Age<65	DM, if Age 65+	HTN Rx	SBP per 10 mmHg, if no HRx	SBP per 10 mmHg, if HRx	region_is_urban	sbp_mean	has_diabetes	household_size	has_health_cover	years_since_quitting_smoking	has_copd	hypertension_diag	rheum_heart_dis_diag	tb_diag	cirrhosis_hep_diag	peptic_ulcer_diag	gall_diag	asthma_diag	kidney_dis_diag	fracture_diag	rheum_arthritis_diag	neurasthenia_diag	head_injury_diag	cancer_diag	blood_transfusions	children	siblings	mother_still_alive	father_still_alive	mother_stroke	mother_heart_attack	mother_diabetes	mother_cancer	father_stroke	father_diabetes	father_heart_attack	father_cancer	siblings_stroke	siblings_diabetes	siblings_heart_attack	siblings_cancer	children_stroke	children_heart_attack	children_diabetes
2017 FSRP (Uncalibrated)	2.41	1.67	0.97	1.49	2.92	1.07	1.14	1.12	1.19
FSRP Inputs (Recalibrated - Aggregate CKB Baseline)	2.41	1.67	0.97	1.49	2.92	1.07	1.14	1.12	1.19
FSRP Inputs (Recalibrated and Refitted - Aggregate CKB Baseline)	2.04	1.23	1.87	0.84	1.76	1.44	1.58	1.1	1.04
FSRP Inputs (Recalibrated - Area-specific CKB Baselines)	2.41	1.67	0.97	1.49	2.92	1.07	1.14	1.12	1.19
FSRP Inputs (Recalibrated and Refitted - Area-specific CKB Baselines)	2.06	1.13	1.32	0.74	1.6	1.3	1.74	1.14	1.07
Expanded Model with CKB Inputs	1.89		1.15	0.82	1.21		1.38	1.05		1	1.03	1.26	1.01	1.28		0.99	1.19	1.34	1			1.11		1.07	1.05	1.04	1.13	1.19	1.17		1	1.01	1.1	1.1	1.12		1.01		1.12			0.95	1.08	1			1.17		1.14
Hemorrhagic Stroke
Hazard Ratios (Male)	Age (10 yrs)	Current Smoking	CHD	Age 65+	DM, if Age<65	DM, if Age 65+	HTN Rx	SBP per 10 mmHg, if no HRx	SBP per 10 mmHg, if HRx	region_is_urban	sbp_mean	has_diabetes	household_size	has_health_cover	years_since_quitting_smoking	has_copd	hypertension_diag	rheum_heart_dis_diag	tb_diag	cirrhosis_hep_diag	peptic_ulcer_diag	gall_diag	asthma_diag	kidney_dis_diag	fracture_diag	rheum_arthritis_diag	neurasthenia_diag	head_injury_diag	cancer_diag	blood_transfusions	children	siblings	mother_still_alive	father_still_alive	mother_stroke	mother_heart_attack	mother_diabetes	mother_cancer	father_stroke	father_diabetes	father_heart_attack	father_cancer	siblings_stroke	siblings_diabetes	siblings_heart_attack	siblings_cancer	children_stroke	children_heart_attack	children_diabetes
2017 FSRP (Uncalibrated)	1.64	1.6	1.57	1.58	3.87	1.41	2.28	1.31	1.1
FSRP Inputs (Recalibrated - Aggregate CKB Baseline)	1.64	1.6	1.57	1.58	3.87	1.41	2.28	1.31	1.1
FSRP Inputs (Recalibrated and Refitted - Aggregate CKB Baseline)	1.83	1.27	1.08	1.06	1.27	0.96	1.71	1.31	1.18
FSRP Inputs (Recalibrated - Area-specific CKB Baselines)	1.64	1.6	1.57	1.58	3.87	1.41	2.28	1.31	1.1
FSRP Inputs (Recalibrated and Refitted - Area-specific CKB Baselines)	1.78	1.13	1.01	1.06	1.44	1.11	2.08	1.32	1.17
Expanded Model with CKB Inputs	1.54			1.11			1.86	1.12		1	1.05	1.31		1			1.2													1.03			1.18	1.12	1.17			0.85				0.8
Hazard Ratios (Female)	Age (10 yrs)	Current Smoking	CHD	Age 65+	DM, if Age<65	DM, if Age 65+	HTN Rx	SBP per 10 mmHg, if no HRx	SBP per 10 mmHg, if HRx	region_is_urban	sbp_mean	has_diabetes	household_size	has_health_cover	years_since_quitting_smoking	has_copd	hypertension_diag	rheum_heart_dis_diag	tb_diag	cirrhosis_hep_diag	peptic_ulcer_diag	gall_diag	asthma_diag	kidney_dis_diag	fracture_diag	rheum_arthritis_diag	neurasthenia_diag	head_injury_diag	cancer_diag	blood_transfusions	children	siblings	mother_still_alive	father_still_alive	mother_stroke	mother_heart_attack	mother_diabetes	mother_cancer	father_stroke	father_diabetes	father_heart_attack	father_cancer	siblings_stroke	siblings_diabetes	siblings_heart_attack	siblings_cancer	children_stroke	children_heart_attack	children_diabetes
2017 FSRP (Uncalibrated)	2.41	1.67	0.97	1.49	2.92	1.07	1.14	1.12	1.19
FSRP Inputs (Recalibrated - Aggregate CKB Baseline)	2.41	1.67	0.97	1.49	2.92	1.07	1.14	1.12	1.19
FSRP Inputs (Recalibrated and Refitted - Aggregate CKB Baseline)	1.64	1.48	1	1.05	1.14	0.9	1.92	1.32	1.19
FSRP Inputs (Recalibrated - Area-specific CKB Baselines)	2.41	1.67	0.97	1.49	2.92	1.07	1.14	1.12	1.19
FSRP Inputs (Recalibrated and Refitted - Area-specific CKB Baselines)	1.74	1.33	0.97	1.06	1.25	1.02	2.31	1.29	1.16
Expanded Model with CKB Inputs	1.55			1.1			2.04	1.1		1	1.05	1.2	1.02	0.99			1.15	1.73												1.07	1.02		1.15	1.112					1.08			0.93	1.11
Fine and Gray Models (Fitted on FSRP Inputs)
Subdistribution Hazard Ratios
Total Stroke (Male)	1.84	1.04	1.39	0.88	1.7	1.24	1.91	1.19	1.08
Total Stroke (Female)	1.99	1.29	1.59	0.79	1.63	1.21	1.65	1.12	1.05
Ischemic Stroke (Male)	1.86	1	1.52	0.81	1.72	1.45	1.67	1.16	1.06
Ischemic Stroke (Female)	2.02	1.11	1.82	0.79	1.77	1.43	1.65	1.08	1.01
Hemorrhagic Stroke (Male)	1.71	1.26	1.05	1.01	1.06	0.78	1.75	1.3	1.17
Hemorrhagic Stroke (Female)	1.61	1.59	1.29	1.13	1.22	0.81	1.44	1.31	1.21
[truncated: 84 more columns]

## Sheet: Model Params - Base Surv
Baseline survival function for an individual with mean CKB risk factor values evaluated at year 8 for each of the reported models.
Baseline Survival at 9 years
Total Stroke	Male	Female		Ischemic Stroke	Male	Female		Hemorrhagic Stroke	Male	Female		Recalibrated/Refitted/Expanded?
FSRP	0.96179	0.97326		FSRP	0.96179	0.97326		FSRP	0.96179	0.97326		Uncalibrated
CKB Aggregate (Recalibrated)	0.9389	0.9603		CKB Aggregate (Recalibrated)	0.9496	0.966		CKB Aggregate (Recalibrated)	0.9865	0.9932		Recalibrated
CKB Aggregate (Recalibrated and Refitted)	0.9302	0.9431		CKB Aggregate (Recalibrated and Refitted)	0.9419	0.9514		CKB Aggregate (Recalibrated and Refitted)	0.9853	0.9911		Recalibrated and Refitted
Qingdao (Urban)	0.9719	0.9794		Qingdao (Urban)	0.9758	0.9817		Qingdao (Urban)	0.9955	0.997		Recalibrated
Harbin (Urban)	0.8635	0.8976		Harbin (Urban)	0.8705	0.9025		Harbin (Urban)	0.9879	0.9942		Recalibrated
Haikou (Urban)	0.9175	0.9398		Haikou (Urban)	0.9251	0.9432		Haikou (Urban)	0.9909	0.9961		Recalibrated
Suzhou (Urban)	0.9709	0.9837		Suzhou (Urban)	0.9779	0.9859		Suzhou (Urban)	0.9932	0.997		Recalibrated
Liuzhou (Urban)	0.9338	0.9643		Liuzhou (Urban)	0.9415	0.9685		Liuzhou (Urban)	0.9883	0.9951		Recalibrated
Sichuan (Rural)	0.9632	0.9783		Sichuan (Rural)	0.9768	0.9845		Sichuan (Rural)	0.9857	0.9926		Recalibrated
Gansu (Rural)	0.9499	0.9666		Gansu (Rural)	0.9669	0.9782		Gansu (Rural)	0.9795	0.9869		Recalibrated
Henan (Rural)	0.9129	0.9426		Henan (Rural)	0.9243	0.9503		Henan (Rural)	0.9852	0.9913		Recalibrated
Zhejiang (Rural)	0.9649	0.9811		Zhejiang (Rural)	0.9734	0.9853		Zhejiang (Rural)	0.9893	0.9955		Recalibrated
Hunan (Rural)	0.9371	0.9632		Hunan (Rural)	0.9563	0.9732		Hunan (Rural)	0.9747	0.9882		Recalibrated
Qingdao (Urban)	0.9622	0.9714		Qingdao (Urban)	0.9669	0.9747		Qingdao (Urban)	0.994	0.9961		Recalibrated and Refitted
Harbin (Urban)	0.8492	0.8628		Harbin (Urban)	0.8563	0.8699		Harbin (Urban)	0.9867	0.992		Recalibrated and Refitted
Haikou (Urban)	0.9024	0.9068		Haikou (Urban)	0.909	0.911		Haikou (Urban)	0.9891	0.9941		Recalibrated and Refitted
Suzhou (Urban)	0.9692	0.9779		Suzhou (Urban)	0.9761	0.9816		Suzhou (Urban)	0.9934	0.9966		Recalibrated and Refitted
Liuzhou (Urban)	0.9326	0.9565		Liuzhou (Urban)	0.9399	0.9613		Liuzhou (Urban)	0.9884	0.9941		Recalibrated and Refitted
Sichuan (Rural)	0.9567	0.9661		Sichuan (Rural)	0.9716	0.9754		Sichuan (Rural)	0.9838	0.99		Recalibrated and Refitted
Gansu (Rural)	0.9348	0.9417		Gansu (Rural)	0.9569	0.9609		Gansu (Rural)	0.9745	0.9803		Recalibrated and Refitted
Henan (Rural)	0.8992	0.9205		Henan (Rural)	0.9114	0.9295		Henan (Rural)	0.9837	0.9897		Recalibrated and Refitted
Zhejiang (Rural)	0.9657	0.9773		Zhejiang (Rural)	0.9737	0.9819		Zhejiang (Rural)	0.9906	0.9952		Recalibrated and Refitted
Hunan (Rural)	0.9274	0.9472		Hunan (Rural)	0.9499	0.961		Hunan (Rural)	0.9731	0.986		Recalibrated and Refitted
Qingdao (Urban)	0.9618	0.9735		Qingdao (Urban)	0.9692	0.9774		Qingdao (Urban)	0.9926	0.9954		CKB Inputs
Harbin (Urban)	0.847	0.8771		Harbin (Urban)	0.8587	0.8781		Harbin (Urban)	0.9825	0.9917		CKB Inputs
Haikou (Urban)	0.9116	0.9158		Haikou (Urban)	0.9155	0.9182		Haikou (Urban)	0.9888	0.9943		CKB Inputs
Suzhou (Urban)	0.9702	0.9792		Suzhou (Urban)	0.9766	0.9833		Suzhou (Urban)	0.993	0.9966		CKB Inputs
Liuzhou (Urban)	0.9343	0.96		Liuzhou (Urban)	0.9409	0.9632		Liuzhou (Urban)	0.9872	0.9942		CKB Inputs
Sichuan (Rural)	0.9642	0.9691		Sichuan (Rural)	0.9751	0.9779		Sichuan (Rural)	0.9887	0.9923		CKB Inputs
Gansu (Rural)	0.9399	0.9416		Gansu (Rural)	0.9608	0.9619		Gansu (Rural)	0.9816	0.9836		CKB Inputs
Henan (Rural)	0.8911	0.9097		Henan (Rural)	0.9106	0.9264		Henan (Rural)	0.9868	0.9902		CKB Inputs
Zhejiang (Rural)	0.9669	0.9762		Zhejiang (Rural)	0.9739	0.9817		Zhejiang (Rural)	0.9913	0.9953		CKB Inputs
Hunan (Rural)	0.9349	0.9483		Hunan (Rural)	0.9521	0.9608		Hunan (Rural)	0.9773	0.9877		CKB Inputs

## Sheet: Model Params - Means
Mean risk factors values for CKB individuals.
	Age (10 yrs)	Current Smoking	CHD	Age 65+	DM, if Age<65	DM, if Age 65+	HTN Rx	SBP per 10 mmHg, if no HRx	SBP per 10 mmHg, if HRx	region_is_urban	sbp_mean	has_diabetes	household_size	has_health_cover	years_since_quitting_smoking	has_copd	hypertension_diag	rheum_heart_dis_diag	tb_diag	cirrhosis_hep_diag	peptic_ulcer_diag	gall_diag	asthma_diag	kidney_dis_diag	fracture_diag	rheum_arthritis_diag	neurasthenia_diag	head_injury_diag	cancer_diag	blood_transfusions	children	siblings	mother_still_alive	father_still_alive	mother_stroke	mother_heart_attack	mother_diabetes	mother_cancer	father_stroke	father_diabetes	father_heart_attack	father_cancer	siblings_stroke	siblings_diabetes	siblings_heart_attack	siblings_cancer	children_stroke	children_heart_attack	children_diabetes
Male	5.26189	0.677036	0.0251349	0.16325	0.0392709	0.0142139	0.0987423	0.967455	0.285042	0.43122	13.2525	0.0534848	3.80797	0.848781	1.39562	0.0873585	0.102288	0.000949867	0.0198839	0.0174142	0.0532266	0.0386084	0.00575278	0.0124262	0.0883766	0.0143259	0.00722873	0.0165472	0.00455936	0.0543275	2.01143	3.33728	0.567285	0.710529	0.0800587	0.0129229	0.032122	0.0603232	0.0962937	0.0170386	0.01577	0.0945566	0.0301357	0.0301844	0.00533784	0.0403531	0.000433529	0.00026304	0.00130546
Female	5.13219	0.0321153	0.0304305	0.125869	0.0432961	0.0162687	0.114015	0.614044	0.35214	0.443468	12.9662	0.0595648	3.79363	0.80221	0.101173	0.0613199	0.112183	0.00233128	0.0110702	0.00837383	0.0290706	0.0750966	0.00526547	0.0160141	0.0558099	0.0247497	0.0134986	0.00706417	0.00528556	0.0662906	2.1273	3.53713	0.534087	0.686373	0.0820205	0.0136662	0.0344339	0.0574939	0.0930514	0.01795	0.0153071	0.0903345	0.0315077	0.0357367	0.00588904	0.0434468	0.000643111	0.000278011	0.0014671
[truncated: 84 more columns]

## Sheet: Calculations
This sheet walks through the risk prediction calculation.
All Risk Factors:	Age (10 yrs)	Current Smoking	CHD	Age 65+	DM, if Age<65	DM, if Age 65+	HTN Rx	SBP per 10 mmHg, if no HRx	SBP per 10 mmHg, if HRx	region_is_urban	sbp_mean	has_diabetes	household_size	has_health_cover	years_since_quitting_smoking	has_copd	hypertension_diag	rheum_heart_dis_diag	tb_diag	cirrhosis_hep_diag	peptic_ulcer_diag	gall_diag	asthma_diag	kidney_dis_diag	fracture_diag	rheum_arthritis_diag	neurasthenia_diag	head_injury_diag	cancer_diag	blood_transfusions	children	siblings	mother_still_alive	father_still_alive	mother_stroke	mother_heart_attack	mother_diabetes	mother_cancer	father_stroke	father_diabetes	father_heart_attack	father_cancer	siblings_stroke	siblings_diabetes	siblings_heart_attack	siblings_cancer	children_stroke	children_heart_attack	children_diabetes
Risk Factor HRs for Selected Model:	2	1.18	1.18	0.87	1.66	1.27	2.01	1.21	1.09	0	0	0	0	0	0	0	0	0	0	0	0	0	0	0	0	0	0	0	0	0	0	0	0	0	0	0	0	0	0	0	0	0	0	0	0	0	0	0	0
Backend: Replace 0s with 1s:	2	1.18	1.18	0.87	1.66	1.27	2.01	1.21	1.09	1	1	1	1	1	1	1	1	1	1	1	1	1	1	1	1	1	1	1	1	1	1	1	1	1	1	1	1	1	1	1	1	1	1	1	1	1	1	1	1
Transform HRs to Coefficients:	0.693147	0.165514	0.165514	-0.139262	0.506818	0.239017	0.698135	0.19062	0.0861777	0	0	0	0	0	0	0	0	0	0	0	0	0	0	0	0	0	0	0	0	0	0	0	0	0	0	0	0	0	0	0	0	0	0	0	0	0	0	0	0
Mean CKB Risk Factor Values:	5.26189	0.677036	0.0251349	0.16325	0.0392709	0.0142139	0.0987423	0.967455	0.285042	0.43122	13.2525	0.0534848	3.80797	0.848781	1.39562	0.0873585	0.102288	0.000949867	0.0198839	0.0174142	0.0532266	0.0386084	0.00575278	0.0124262	0.0883766	0.0143259	0.00722873	0.0165472	0.00455936	0.0543275	2.01143	3.33728	0.567285	0.710529	0.0800587	0.0129229	0.032122	0.0603232	0.0962937	0.0170386	0.01577	0.0945566	0.0301357	0.0301844	0.00533784	0.0403531	0.000433529	0.00026304	0.00130546
Individual's Risk Factor Values:	4	0	0	0	0	0	0	1	0	1	13	0	0	0	0	0	0	0	0	0	0	0	0	0	0	0	0	0	0	0	0	0	0	0	0	0	0	0	0	0	0	0	0	0	0	0	0	0	0
Backend: Pulls in additional values for males, total stroke													0		0	0	0		0					0							0		0	0	0	0			0			0	0		0				0
Backend: Pulls in additional values for females, total stroke													0			0	0	0	0	0		0		0	0	0	0	0	0		0	0	0	0	0				0				0	0	0		0		0
Backend: Pulls in additional values for males, IS													0	0	0	0	0							0				0			0		0	0	0				0				0		0				0
Backend: Pulls in additional values for females, IS													0	0		0	0	0	0			0		0	0	0	0	0	0		0	0	0	0	0		0		0			0	0	0			0		0
Backend: Pulls in additional values for males, HS														0			0													0			0	0	0			0				0
Backend: Pulls in additional values for females, HS													0	0			0	0												0	0		0	0					0			0	0
Exponent:	0.340017		2.96321
Baseline Survival Function Value for Selected Model:	Total Stroke		IS		HS
	0.8492		0.8563		0.9867
Risk Prediction:	0.054063
[truncated: 84 more columns]

## Sheet: Risk Factor Definitions
List of all CKB inputs and their definitions
Age (10 yrs)	Age in decades
Current Smoking	Do you currently smoke (0: no, 1: yes)
CHD	Has a doctor EVER told you that you had coronary heart disease? (0: no, 1: yes)
Age 65+	Age >= 65 years? (0: no, 1: yes)
DM, if Age<65	IF age < 65 years, do you have diabetes? (0: no, 1: yes)
DM, if Age 65+	IF age >= 65 years, do you have diabetes? (0: no, 1: yes)
HTN Rx	Do you use blood pressure drugs? (0: no, 1: yes)
SBP per 10 mmHg, if no HRx	IF not using blood pressure drugs, what is your systolic blood pressure (in mmHg) / 10
SBP per 10 mmHg, if HRx	IF using blood pressure drugs, what is your systolic blood pressure (in mmHg) / 10
region_is_urban	Is region urban? (0: no, 1: yes)
sbp_mean	Systolic blood pressure in mmHg (mean of two measurements)
has_diabetes	Do you have diabetes? (0: no, 1: yes)
household_size	How many people live together in your household?
has_health_cover	Do you have health care coverage? (0: no, 1: yes)
years_since_quitting_smoking	How many years since quitting smoking? (0 if you currently smoke or never smoked; decimal values allowed)
has_copd	Has a doctor EVER told you that you had COPD? (0: no, 1: yes)
hypertension_diag	Has a doctor EVER told you that you had hypertension? (0: no, 1: yes)
rheum_heart_dis_diag	Has a doctor EVER told you that you had rheumatic heart disease? (0: no, 1: yes)
tb_diag	Has a doctor EVER told you that you had TB? (0: no, 1: yes)
cirrhosis_hep_diag	Has a doctor EVER told you that you had cirrhosis/chronic hepatitis? (0: no, 1: yes)
peptic_ulcer_diag	Has a doctor EVER told you that you had a peptic ulcer? (0: no, 1: yes)
gall_diag	Has a doctor EVER told you that you had a gallstone/gallbladder dis.? (0: no, 1: yes)
asthma_diag	Has a doctor EVER told you that you had asthma? (0: no, 1: yes)
kidney_dis_diag	Has a doctor EVER told you that you had kidney disease? (0: no, 1: yes)
fracture_diag	Has a doctor EVER told you that you had a fracture? (0: no, 1: yes)
rheum_arthritis_diag	Has a doctor EVER told you that you had rheumatoid arthritis? (0: no, 1: yes)
neurasthenia_diag	Has a doctor EVER told you that you had neurasthenia? (0: no, 1: yes)
head_injury_diag	Has a doctor EVER told you that you had a head injury? (0: no, 1: yes)
cancer_diag	Has a doctor EVER told you that you had cancer? (0: no, 1: yes)
blood_transfusions	How many blood transfusions have you received? (if none, put 0)
children	How many children do you have?
siblings	How many siblings do you have?
mother_still_alive	Is your mother still alive? (0: no, 1: yes)
father_still_alive	Is your father still alive? (0: no, 1: yes)
mother_stroke	Did your mother ever have a stroke? (0: no, 1: yes)
mother_heart_attack	Did your mother ever have a heart attack? (0: no, 1: yes)
mother_diabetes	Did your mother ever have diabetes? (0: no, 1: yes)
mother_cancer	Did your mother ever have cancer? (0: no, 1: yes)
father_stroke	Did your father ever have a stroke? (0: no, 1: yes)
father_diabetes	Did your father ever have diabetes? (0: no, 1: yes)
father_heart_attack	Did your father ever have a heart attack? (0: no, 1: yes)
father_cancer	Did your father ever have cancer? (0: no, 1: yes)
siblings_stroke	Did your siblings (incl. half siblings) ever have a stroke? (0: if no, else record the number with disease)
siblings_diabetes	Did your siblings (incl. half siblings) ever have diabetes? (0: if no, else record the number with disease)
siblings_heart_attack	Did your siblings (incl. half siblings) ever have a heart attack? (0: if no, else record the number with disease)
siblings_cancer	Did your siblings (incl. half siblings) ever have cancer? (0: if no, else record the number with disease)
children_stroke	Did your children ever have a stroke? (0: if no, else record the number with disease)
children_heart_attack	Did your children ever have a heart attack? (0: if no, else record the number with disease)
children_diabetes	Did your children ever have diabetes? (0: if no, else record the number with disease)
children_cancer	Did your children ever have cancer? (0: if no, else record the number with disease)
met	Total daily physical activity (Metabolic Equivalent of Task)
met_hours	Total daily hours spent on physical activity
standing_height_cm	Standing height in cm (without shoes)
sitting_height_cm	Sitting height in cm
waist_cm	Waist measurement in cm
waist_hip_ratio_percent	Waist to hip ratio
weight_kg	Weight in kg (without shoes, but in light clothing)
bmi_calc	BMI calculated from measured height and weight (in kg/m^2)
fat_percent	Body fat percentage (percent * 100)
dbp_mean	Diastolic BP in mmHg (mean of two measurements)
heart_rate_mean_10s	Heart rate (bpm/10)
smoking_category_1	Does the following characterize your smoking behavior? -- Never smoker (0: no, 1: yes)
smoking_category_2	Does the following characterize your smoking behavior? -- Occasional smoker (0: no, 1: yes)
smoking_category_3	Does the following characterize your smoking behavior? -- Ex regular smoker (0: no, 1: yes)
smoking_category_4	Does the following characterize your smoking behavior? -- Regular smoker (0: no, 1: yes)
emph_bronc_diag	Has a doctor EVER told you that you had emphysema/bronchitis? (0: no, 1: yes)
psych_disorder_diag	Has a doctor EVER told you that you have a psychiatric disorder? (0: no, 1: yes)
highest_education_0	What is the highest level of school education you ever received? -- No formal school (0: no, 1: yes)
highest_education_1	What is the highest level of school education you ever received? -- Primary School (0: no, 1: yes)
highest_education_2	What is the highest level of school education you ever received? -- Middle School (0: no, 1: yes)
highest_education_3	What is the highest level of school education you ever received? -- High School (0: no, 1: yes)
highest_education_4	What is the highest level of school education you ever received? -- Technical school / college (0: no, 1: yes)
highest_education_5	What is the highest level of school education you ever received? -- University (0: no, 1: yes)
occupation_0	What is your current occupation? -- Agriculture & related workers (0: no, 1: yes)
occupation_1	What is your current occupation? -- Factory worker (0: no, 1: yes)
occupation_2	What is your current occupation? -- Administrator / manager (0: no, 1: yes)
occupation_3	What is your current occupation? -- Professional / technical (0: no, 1: yes)
occupation_4	What is your current occupation? -- Sales & service workers (0: no, 1: yes)
occupation_5	What is your current occupation? -- Retired (0: no, 1: yes)
occupation_6	What is your current occupation? -- House wife / husband (0: no, 1: yes)
occupation_7	What is your current occupation? -- Self-employed (0: no, 1: yes)
occupation_8	What is your current occupation? -- Unemployed (0: no, 1: yes)
occupation_9	What is your current occupation? -- Other or not stated (0: no, 1: yes)
household_income_0	What is the total income last year in your household? -- <2,500 yuan (0: no, 1: yes)
household_income_1	What is the total income last year in your household? -- 2,500-4,999 yuan (0: no, 1: yes)
household_income_2	What is the total income last year in your household? -- 5,000-9,999 yuan (0: no, 1: yes)
household_income_3	What is the total income last year in your household? -- 10,000-19,999 yuan (0: no, 1: yes)
household_income_4	What is the total income last year in your household? -- 20,000-34,999 yuan (0: no, 1: yes)
household_income_5	What is the total income last year in your household? -- >=35,000 yuan (0: no, 1: yes)
alcohol_category_1	Does the following characterize your alcohol intake? -- Never regular (0: no; 1: yes)
alcohol_category_2	Does the following characterize your alcohol intake? -- Ex-regular (0: no; 1: yes)
alcohol_category_3	Does the following characterize your alcohol intake? -- Occasional (0: no; 1: yes)
alcohol_category_4	Does the following characterize your alcohol intake? -- Monthly (0: no; 1: yes)
alcohol_category_5	Does the following characterize your alcohol intake? -- Reduced intake (0: no; 1: yes)
alcohol_category_6	Does the following characterize your alcohol intake? -- Weekly (0: no; 1: yes)
smoking_now_0	Does the following characterize your smoking behavior? -- Do not smoke now (0: no; 1: yes)
smoking_now_1	Does the following characterize your smoking behavior? -- Only occasionally (0: no; 1: yes)
smoking_now_2	Does the following characterize your smoking behavior? -- Yes, on most days (0: no; 1: yes)
smoking_now_3	Does the following characterize your smoking behavior? -- Yes, daily or almost every day (0: no; 1: yes)
self_rated_health_0	How would you rate your current general health status? -- Excellent (0: no, 1: yes)
self_rated_health_1	How would you rate your current general health status? -- Good (0: no, 1: yes)
self_rated_health_2	How would you rate your current general health status? -- Fair (0: no, 1: yes)
self_rated_health_3	How would you rate your current general health status? -- Poor (0: no, 1: yes)
comparative_health_0	How would rate your current general health status compared to someone of your own age? -- Better (0: no, 1: yes)
comparative_health_1	How would rate your current general health status compared to someone of your own age? -- About the same (0: no, 1: yes)
comparative_health_2	How would rate your current general health status compared to someone of your own age? -- Worse (0: no, 1: yes)
comparative_health_3	How would rate your current general health status compared to someone of your own age? -- Don't know (0: no, 1: yes)
diet_freq_rice_0	During the past 12 months, about how often did you eat rice? -- Daily (0: no, 1: yes)
diet_freq_rice_1	During the past 12 months, about how often did you eat rice? -- 4-6 days per week (0: no, 1: yes)
diet_freq_rice_2	During the past 12 months, about how often did you eat rice? -- 1-3 days per week (0: no, 1: yes)
diet_freq_rice_3	During the past 12 months, about how often did you eat rice? -- Monthly (0: no, 1: yes)
diet_freq_rice_4	During the past 12 months, about how often did you eat rice? -- Never/rarely (0: no, 1:yes)
diet_freq_wheat_0	During the past 12 months, about how often did you eat wheat? -- Daily (0: no, 1: yes)
diet_freq_wheat_1	During the past 12 months, about how often did you eat wheat? -- 4-6 days per week (0: no, 1: yes)
diet_freq_wheat_2	During the past 12 months, about how often did you eat wheat? -- 1-3 days per week (0: no, 1: yes)
diet_freq_wheat_3	During the past 12 months, about how often did you eat wheat? -- Monthly (0: no, 1: yes)
diet_freq_wheat_4	During the past 12 months, about how often did you eat wheat? -- Never/rarely (0: no, 1:yes)
diet_freq_other_staple_0	During the past 12 months, about how often did you eat staple foods other than rice and wheat (corn, millet etc.)? -- Daily (0: no, 1: yes)
diet_freq_other_staple_1	During the past 12 months, about how often did you eat staple foods other than rice and wheat (corn, millet etc.)? -- 4-6 days per week (0: no, 1: yes)
diet_freq_other_staple_2	During the past 12 months, about how often did you eat staple foods other than rice and wheat (corn, millet etc.)? -- 1-3 days per week (0: no, 1: yes)
diet_freq_other_staple_3	During the past 12 months, about how often did you eat staple foods other than rice and wheat (corn, millet etc.)? -- Monthly (0: no, 1: yes)
diet_freq_other_staple_4	During the past 12 months, about how often did you eat staple foods other than rice and wheat (corn, millet etc.)? -- Never/rarely (0: no, 1:yes)
bowel_movement_freq_0	About how often do you have bowel movements each week? -- More than once on most days (0: no, 1:yes)
bowel_movement_freq_1	About how often do you have bowel movements each week? -- About daily (0: no, 1:yes)
bowel_movement_freq_2	About how often do you have bowel movements each week? -- Once every 2-3 days (0: no, 1:yes)
bowel_movement_freq_3	About how often do you have bowel movements each week? -- Less than 3 times a week (0: no, 1:yes)
gum_bleed_freq_0	How often do your gums bleed when you brush your teeth? -- Occasionally, rarely or never (0: no, 1:yes)
gum_bleed_freq_1	How often do your gums bleed when you brush your teeth? -- Sometimes (0: no, 1:yes)
gum_bleed_freq_2	How often do your gums bleed when you brush your teeth? -- Always (0: no, 1:yes)
gum_bleed_freq_3	How often do your gums bleed when you brush your teeth? -- Brush teeth rarely or never (0: no, 1:yes)
missing_mother_history	Are you unable to answer if your mother had any of the following: stroke, heart attack, diabetes, cancer? (0: no, 1: yes)
missing_father_history	Are you unable to answer if your father had any of the following: stroke, heart attack, diabetes, cancer? (0: no, 1: yes)
missing_siblings_history	Are you unable to answer if your siblings had any of the following: stroke, heart attack, diabetes, cancer? (0: no, 1: yes)

## Sheet: Risk Factor Qs
Total Stroke
	Male, Total Stroke	Female, Total Stroke	Male, IS	Female, IS	Male, HS	Female, HS
FSRP Questions	Expanded Model with CKB Inputs	Expanded Model with CKB Inputs	Expanded Model with CKB Inputs	Expanded Model with CKB Inputs	Expanded Model with CKB Inputs	Expanded Model with CKB Inputs
Age (yrs)	Age (yrs)	Age (yrs)	Age (yrs)	Age (yrs)	Age (yrs)	Age (yrs)
Current Smoking (0 for no; 1 for yes)	Current Smoking (0 for no; 1 for yes)	Current Smoking (0 for no; 1 for yes)	Current Smoking (0 for no; 1 for yes)	Current Smoking (0 for no; 1 for yes)	Current Smoking (0 for no; 1 for yes)	Current Smoking (0 for no; 1 for yes)
History of CHD? (0 for no; 1 for yes)	History of CHD? (0 for no; 1 for yes)	History of CHD? (0 for no; 1 for yes)	History of CHD? (0 for no; 1 for yes)	History of CHD? (0 for no; 1 for yes)	History of CHD? (0 for no; 1 for yes)	History of CHD? (0 for no; 1 for yes)
Has Diabetes? (0 for no; 1 for yes)	Has Diabetes? (0 for no; 1 for yes)	Has Diabetes? (0 for no; 1 for yes)	Has Diabetes? (0 for no; 1 for yes)	Has Diabetes? (0 for no; 1 for yes)	Has Diabetes? (0 for no; 1 for yes)	Has Diabetes? (0 for no; 1 for yes)
Used BP-lowering drugs? (0 for no; 1 for yes)	Used BP-lowering drugs? (0 for no; 1 for yes)	Used BP-lowering drugs? (0 for no; 1 for yes)	Used BP-lowering drugs? (0 for no; 1 for yes)	Used BP-lowering drugs? (0 for no; 1 for yes)	Used BP-lowering drugs? (0 for no; 1 for yes)	Used BP-lowering drugs? (0 for no; 1 for yes)
SBP (in mmHg)	Systolic BP (in mmHg)	Systolic BP (in mmHg)	Systolic BP (in mmHg)	Systolic BP (in mmHg)	Systolic BP (in mmHg)	Systolic BP (in mmHg)
	How many people live together in your household?	How many people live together in your household?	How many people live together in your household?	How many people live together in your household?	Do you have health care coverage? (0: no, 1: yes)	How many people live together in your household?
	How many years since quitting smoking? (0 if you currently smoke or never smoked; decimal values allowed)	Has a doctor EVER told you that you had COPD? (0: no, 1: yes)	Do you have health care coverage? (0: no, 1: yes)	Do you have health care coverage? (0: no, 1: yes)	Has a doctor EVER told you that you had hypertension? (0: no, 1: yes)	Do you have health care coverage? (0: no, 1: yes)
	Has a doctor EVER told you that you had COPD? (0: no, 1: yes)	Has a doctor EVER told you that you had hypertension? (0: no, 1: yes)	How many years since quitting smoking? (0 if you currently smoke or never smoked; decimal values allowed)	Has a doctor EVER told you that you had COPD? (0: no, 1: yes)	How many blood transfusions have you received? (if none, put 0)	Has a doctor EVER told you that you had hypertension? (0: no, 1: yes)
	Has a doctor EVER told you that you had hypertension? (0: no, 1: yes)	Has a doctor EVER told you that you had rheumatic heart disease? (0: no, 1: yes)	Has a doctor EVER told you that you had COPD? (0: no, 1: yes)	Has a doctor EVER told you that you had hypertension? (0: no, 1: yes)	Is your mother still alive? (0: no, 1: yes)	Has a doctor EVER told you that you had rheumatic heart disease? (0: no, 1: yes)
	Has a doctor EVER told you that you had TB? (0: no, 1: yes)	Has a doctor EVER told you that you had TB? (0: no, 1: yes)	Has a doctor EVER told you that you had hypertension? (0: no, 1: yes)	Has a doctor EVER told you that you had rheumatic heart disease? (0: no, 1: yes)	Is your father still alive? (0: no, 1: yes)	How many blood transfusions have you received? (if none, put 0)
	Has a doctor EVER told you that you had kidney disease? (0: no, 1: yes)	Has a doctor EVER told you that you had cirrhosis/chronic hepatitis? (0: no, 1: yes)	Has a doctor EVER told you that you had kidney disease? (0: no, 1: yes)	Has a doctor EVER told you that you had TB? (0: no, 1: yes)	Did your mother ever have a stroke? (0: no, 1: yes)	How many children do you have?
	How many children do you have?	Has a doctor EVER told you that you had a gallstone/gallbladder dis.? (0: no, 1: yes)	Has a doctor EVER told you that you had a head injury? (0: no, 1: yes)	Has a doctor EVER told you that you had a gallstone/gallbladder dis.? (0: no, 1: yes)	Did your mother ever have cancer? (0: no, 1: yes)	Is your mother still alive? (0: no, 1: yes)
	Is your mother still alive? (0: no, 1: yes)	Has a doctor EVER told you that you had kidney disease? (0: no, 1: yes)	How many children do you have?	Has a doctor EVER told you that you had kidney disease? (0: no, 1: yes)	Did your father ever have cancer? (0: no, 1: yes)	Is your father still alive? (0: no, 1: yes)
	Is your father still alive? (0: no, 1: yes)	Has a doctor EVER told you that you had a fracture? (0: no, 1: yes)	Is your mother still alive? (0: no, 1: yes)	Has a doctor EVER told you that you had a fracture? (0: no, 1: yes)	Total daily physical activity (Metabolic Equivalent of Task)	Did your father ever have a stroke? (0: no, 1: yes)
	Did your mother ever have a stroke? (0: no, 1: yes)	Has a doctor EVER told you that you had rheumatoid arthritis? (0: no, 1: yes)	Is your father still alive? (0: no, 1: yes)	Has a doctor EVER told you that you had rheumatoid arthritis? (0: no, 1: yes)	Total daily hours spent on physical activity	Did your father ever have cancer? (0: no, 1: yes)
	Did your mother ever have a heart attack? (0: no, 1: yes)	Has a doctor EVER told you that you had neurasthenia? (0: no, 1: yes)	Did your mother ever have a stroke? (0: no, 1: yes)	Has a doctor EVER told you that you had neurasthenia? (0: no, 1: yes)	Standing height in cm (without shoes)	Did your siblings (incl. half siblings) ever have a stroke? (0: if no, else record the number with disease)
	Did your father ever have a stroke? (0: no, 1: yes)	Has a doctor EVER told you that you had a head injury? (0: no, 1: yes)	Did your father ever have a stroke? (0: no, 1: yes)	Has a doctor EVER told you that you had a head injury? (0: no, 1: yes)	Sitting height in cm	Total daily physical activity (Metabolic Equivalent of Task)
	Did your father ever have cancer? (0: no, 1: yes)	Has a doctor EVER told you that you had cancer? (0: no, 1: yes)	Did your siblings (incl. half siblings) ever have a stroke? (0: if no, else record the number with disease)	Has a doctor EVER told you that you had cancer? (0: no, 1: yes)	Waist to hip ratio	Total daily hours spent on physical activity
	Did your siblings (incl. half siblings) ever have a stroke? (0: if no, else record the number with stroke)	How many children do you have?	Did your siblings (incl. half siblings) ever have a heart attack? (0: if no, else record the number with disease)	How many children do you have?	Body fat percentage (percent * 100)	Standing height in cm (without shoes)
	Did your siblings (incl. half siblings) ever have a heart attack? (0: if no, else record the number with heart attack)	How many siblings do you have?	Did your children ever have diabetes? (0: if no, else record the number with disease)	How many siblings do you have?	Diastolic BP (in mmHg)	Waist to hip ratio
	Did your children ever have diabetes? (0: if no, else record the number with diabetes)	Is your mother still alive? (0: no, 1: yes)	Total daily physical activity (Metabolic Equivalent of Task)	Is your mother still alive? (0: no, 1: yes)	Heart rate (bpm/10)	Body fat percentage (percent * 100)
	Total daily physical activity (Metabolic Equivalent of Task)	Is your father still alive? (0: no, 1: yes)	Total daily hours spent on physical activity	Is your father still alive? (0: no, 1: yes)	Does the following characterize your smoking behavior? -- Regular smoker (0: no, 1: yes)	Diastolic BP (in mmHg)
	Total daily hours spent on physical activity	Did your mother ever have a stroke? (0: no, 1: yes)	Standing height in cm (without shoes)	Did your mother ever have a stroke? (0: no, 1: yes)	What is your current occupation? -- Agriculture & related workers (0: no, 1: yes)	Heart rate (bpm/10)
	Standing height in cm (without shoes)	Did your father ever have a stroke? (0: no, 1: yes)	Waist measurement in cm	Did your mother ever have diabetes? (0: no, 1: yes)	What is your current occupation? -- Factory worker (0: no, 1: yes)	Does the following characterize your smoking behavior? -- Never smoker (0: no, 1: yes)
	Waist measurement in cm	Did your siblings (incl. half siblings) ever have a stroke? (0: if no, else record the number with disease)	Body fat percentage (percent * 100)	Did your father ever have a stroke? (0: no, 1: yes)	What is your current occupation? -- House wife / husband (0: no, 1: yes)	What is your current occupation? -- House wife / husband (0: no, 1: yes)
	Body fat percentage (percent * 100)	Did your siblings (incl. half siblings) ever have diabetes? (0: if no, else record the number with disease)	Diastolic BP (in mmHg)	Did your father ever have cancer? (0: no, 1: yes)	What is the total income last year in your household? -- <2,500 yuan (0: no, 1: yes)	What is the total income last year in your household? -- >=35,000 yuan (0: no, 1: yes)
	Diastolic BP (in mmHg)	Did your siblings (incl. half siblings) ever have a heart attack? (0: if no, else record the number with disease)	Has a doctor EVER told you that you had emphysema/bronchitis? (0: no, 1: yes)	Did your siblings (incl. half siblings) ever have a stroke? (0: if no, else record the number with disease)	What is the total income last year in your household? -- 10,000-19,999 yuan (0: no, 1: yes)	Does the following characterize your alcohol intake? -- Ex-regular (0: no; 1: yes)
	Do you smoke regularly? (0: no, 1: yes)	Did your children ever have a stroke? (0: if no, else record the number with disease)	What is the highest level of school education you ever received? -- No formal school (0: no, 1: yes)	Did your siblings (incl. half siblings) ever have diabetes? (0: if no, else record the number with disease)	What is the total income last year in your household? -- 20,000-34,999 yuan (0: no, 1: yes)	How would you rate your current general health status? -- Good (0: no, 1: yes)
	Has a doctor EVER told you that you had emphysema/bronchitis? (0: no, 1: yes)	Did your children ever have diabetes? (0: if no, else record the number with disease)	What is the highest level of school education you ever received? -- Primary School (0: no, 1: yes)	Did your children ever have a stroke? (0: if no, else record the number with disease)	What is the total income last year in your household? -- >=35,000 yuan (0: no, 1: yes)	How would you rate your current general health status? -- Poor (0: no, 1: yes)
	What is the highest level of school education you ever received? -- No formal school (0: no, 1: yes)	Total daily physical activity (Metabolic Equivalent of Task)	What is the highest level of school education you ever received? -- High School (0: no, 1: yes)	Did your children ever have diabetes? (0: if no, else record the number with disease)	Does the following characterize your alcohol intake? -- Never regular (0: no; 1: yes)	How would rate your current general health status compared to someone of your own age? -- Worse (0: no, 1: yes)
	What is the highest level of school education you ever received? -- Primary School (0: no, 1: yes)	Standing height in cm (without shoes)	What is the highest level of school education you ever received? -- University (0: no, 1: yes)	Total daily physical activity (Metabolic Equivalent of Task)	Does the following characterize your alcohol intake? -- Ex-regular (0: no; 1: yes)	During the past 12 months, about how often did you eat rice? -- Monthly (0: no, 1: yes)
	What is the highest level of school education you ever received? -- High School (0: no, 1: yes)	Waist measurement in cm	What is your current occupation? -- Factory worker (0: no, 1: yes)	Standing height in cm (without shoes)	How would you rate your current general health status? -- Excellent (0: no, 1: yes)	During the past 12 months, about how often did you eat rice? -- Never/rarely (0: no, 1:yes)
	What is the highest level of school education you ever received? -- Technical school / college (0: no, 1: yes)	Diastolic BP (in mmHg)	What is your current occupation? -- Retired (0: no, 1: yes)	Sitting height in cm	How would you rate your current general health status? -- Fair (0: no, 1: yes)	During the past 12 months, about how often did you eat wheat? -- Daily (0: no, 1: yes)
	What is the highest level of school education you ever received? -- University (0: no, 1: yes)	Heart rate (bpm/10)	What is your current occupation? -- Other or not stated (0: no, 1: yes)	Waist measurement in cm	How would you rate your current general health status? -- Poor (0: no, 1: yes)	During the past 12 months, about how often did you eat wheat? -- Monthly (0: no, 1: yes)
	What is your current occupation? -- Factory worker (0: no, 1: yes)	Does the followng characterize your smoking behavior? -- Never smoker (0: no, 1: yes)	What is the total income last year in your household? -- 10,000-19,999 yuan (0: no, 1: yes)	Diastolic BP (in mmHg)	How would rate your current general health status compared to someone of your own age? -- Worse (0: no, 1: yes)	During the past 12 months, about how often did you eat wheat? -- Never/rarely (0: no, 1:yes)
	What is your current occupation? -- Retired (0: no, 1: yes)	Does the followng characterize your smoking behavior? -- Ex regular smoker (0: no, 1: yes)	What is the total income last year in your household? -- >=35,000 yuan (0: no, 1: yes)	Heart rate (bpm/10)	During the past 12 months, about how often did you eat rice? -- Monthly (0: no, 1: yes)	How often do your gums bleed when you brush your teeth? -- Brush teeth rarely or never (0: no, 1:yes)
	What is your current occupation? -- House wife / husband (0: no, 1: yes)	What is the highest level of school education you ever received? -- No formal school (0: no, 1: yes)	Does the following characterize your alcohol intake? -- Never regular (0: no; 1: yes)	Does the following characterize your smoking behavior? -- Never smoker (0: no, 1: yes)	During the past 12 months, about how often did you eat rice? -- Never/rarely (0: no, 1:yes)
	What is the total income last year in your household? -- 2,500-4,999 yuan (0: no, 1: yes)	What is the highest level of school education you ever received? -- Primary School (0: no, 1: yes)	Does the following characterize your alcohol intake? -- Ex-regular (0: no; 1: yes)	Does the following characterize your smoking behavior? -- Ex regular smoker (0: no, 1: yes)	During the past 12 months, about how often did you eat wheat? -- Daily (0: no, 1: yes)
	What is the total income last year in your household? -- 10,000-19,999 yuan (0: no, 1: yes)	What is the highest level of school education you ever received? -- High School (0: no, 1: yes)	Does the following characterize your alcohol intake? -- Occasional (0: no; 1: yes)	Does the following characterize your smoking behavior? -- Regular smoker (0: no, 1: yes)	During the past 12 months, about how often did you eat staple foods other than rice and wheat (corn, millet etc.)? -- Monthly (0: no, 1: yes)
	What is the total income last year in your household? -- >=35,000 yuan (0: no, 1: yes)	What is the highest level of school education you ever received? -- Technical school / college (0: no, 1: yes)	Does the following characterize your alcohol intake? -- Reduced intake (0: no; 1: yes)	What is the highest level of school education you ever received? -- No formal school (0: no, 1: yes)	How often do your gums bleed when you brush your teeth? -- Brush teeth rarely or never (0: no, 1:yes)
	Does the following characterize your alcohol intake? -- Never regular (0: no; 1: yes)	What is the highest level of school education you ever received? -- University (0: no, 1: yes)	Does the following characterize your smoking behavior? -- Yes, daily or almost every day (0: no; 1: yes)	What is the highest level of school education you ever received? -- Primary School (0: no, 1: yes)
	Does the following characterize your alcohol intake? -- Ex-regular (0: no; 1: yes)	What is your current occupation? -- Factory worker (0: no, 1: yes)	How would you rate your current general health status? -- Good (0: no, 1: yes)	What is the highest level of school education you ever received? -- High School (0: no, 1: yes)
	Does the following characterize your alcohol intake? -- Occasional (0: no; 1: yes)	What is your current occupation? -- Retired (0: no, 1: yes)	How would you rate your current general health status? -- Poor (0: no, 1: yes)	What is the highest level of school education you ever received? -- Technical school / college (0: no, 1: yes)
	Does the following characterize your alcohol intake? -- Reduced intake (0: no; 1: yes)	What is your current occupation? -- Other or not stated (0: no, 1: yes)	How would rate your current general health status compared to someone of your own age? -- Better (0: no, 1: yes)	What is the highest level of school education you ever received? -- University (0: no, 1: yes)
	Does the following characterize your smoking behavior? -- Yes, daily or almost every day (0: no; 1: yes)	What is the total income last year in your household? -- 5,000-9,999 yuan (0: no, 1: yes)	How would rate your current general health status compared to someone of your own age? -- Worse (0: no, 1: yes)	What is your current occupation? -- Factory worker (0: no, 1: yes)
	How would you rate your current general health status? -- Good (0: no, 1: yes)	What is the total income last year in your household? -- 10,000-19,999 yuan (0: no, 1: yes)	How would rate your current general health status compared to someone of your own age? -- Don't know (0: no, 1: yes)	What is your current occupation? -- Sales & service workers (0: no, 1: yes)
	How would you rate your current general health status? -- Fair (0: no, 1: yes)	What is the total income last year in your household? -- 20,000-34,999 yuan (0: no, 1: yes)	During the past 12 months, about how often did you eat rice? -- Daily (0: no, 1: yes)	What is your current occupation? -- Retired (0: no, 1: yes)
	How would you rate your current general health status? -- Poor (0: no, 1: yes)	What is the total income last year in your household? -- >=35,000 yuan (0: no, 1: yes)	During the past 12 months, about how often did you eat rice? -- 4-6 days per week (0: no, 1: yes)	What is your current occupation? -- House wife / husband (0: no, 1: yes)
	How would rate your current general health status compared to someone of your own age? -- Better (0: no, 1: yes)	Does the following characterize your alcohol intake? -- Never regular (0: no; 1: yes)	During the past 12 months, about how often did you eat wheat? -- Daily (0: no, 1: yes)	What is your current occupation? -- Other or not stated (0: no, 1: yes)
	How would rate your current general health status compared to someone of your own age? -- Worse (0: no, 1: yes)	Does the following characterize your alcohol intake? -- Monthly (0: no; 1: yes)	During the past 12 months, about how often did you eat wheat? -- 4-6 days per week (0: no, 1: yes)	What is the total income last year in your household? -- 5,000-9,999 yuan (0: no, 1: yes)
	How would rate your current general health status compared to someone of your own age? -- Don't know (0: no, 1: yes)	Does the following characterize your smoking behavior? -- Yes, daily or almost every day (0: no; 1: yes)	During the past 12 months, about how often did you eat wheat? -- Monthly (0: no, 1: yes)	What is the total income last year in your household? -- 10,000-19,999 yuan (0: no, 1: yes)
	During the past 12 months, about how often did you eat rice? -- 4-6 days per week (0: no, 1: yes)	How would you rate your current general health status? -- Good (0: no, 1: yes)	During the past 12 months, about how often did you eat wheat? -- Never/rarely (0: no, 1:yes)	What is the total income last year in your household? -- 20,000-34,999 yuan (0: no, 1: yes)
	During the past 12 months, about how often did you eat rice? -- 1-3 days per week (0: no, 1: yes)	How would you rate your current general health status? -- Poor (0: no, 1: yes)	During the past 12 months, about how often did you eat staple foods other than rice and wheat (corn, millet etc.)? -- Daily (0: no, 1: yes)	What is the total income last year in your household? -- >=35,000 yuan (0: no, 1: yes)
	During the past 12 months, about how often did you eat wheat? -- Daily (0: no, 1: yes)	How would rate your current general health status compared to someone of your own age? -- Better (0: no, 1: yes)	During the past 12 months, about how often did you eat staple foods other than rice and wheat (corn, millet etc.)? -- 4-6 days per week (0: no, 1: yes)	Does the following characterize your alcohol intake? -- Never regular (0: no; 1: yes)
	During the past 12 months, about how often did you eat wheat? -- Monthly (0: no, 1: yes)	How would rate your current general health status compared to someone of your own age? -- Worse (0: no, 1: yes)	During the past 12 months, about how often did you eat staple foods other than rice and wheat (corn, millet etc.)? -- 1-3 days per week (0: no, 1: yes)	Does the following characterize your alcohol intake? -- Monthly (0: no; 1: yes)
	During the past 12 months, about how often did you eat wheat? -- Never/rarely (0: no, 1:yes)	How would rate your current general health status compared to someone of your own age? -- Don't know (0: no, 1: yes)	About how often do you have bowel movements each week? -- About daily (0: no, 1:yes)	Does the following characterize your smoking behavior? -- Yes, on most days (0: no; 1: yes)
	During the past 12 months, about how often did you eat staple foods other than rice and wheat (corn, millet etc.)? -- Daily (0: no, 1: yes)	During the past 12 months, about how often did you eat rice? -- 1-3 days per week (0: no, 1: yes)	About how often do you have bowel movements each week? -- Less than 3 times a week (0: no, 1:yes)	Does the following characterize your smoking behavior? -- Yes, daily or almost every day (0: no; 1: yes)
	During the past 12 months, about how often did you eat staple foods other than rice and wheat (corn, millet etc.)? -- 4-6 days per week (0: no, 1: yes)	During the past 12 months, about how often did you eat wheat? -- Daily (0: no, 1: yes)	How often do your gums bleed when you brush your teeth? -- Brush teeth rarely or never (0: no, 1:yes)	How would you rate your current general health status? -- Good (0: no, 1: yes)
	During the past 12 months, about how often did you eat staple foods other than rice and wheat (corn, millet etc.)? -- 1-3 days per week (0: no, 1: yes)	During the past 12 months, about how often did you eat wheat? -- 4-6 days per week (0: no, 1: yes)	Are you unable to answer if your mother had any of the following: stroke, heart attack, diabetes, cancer? (0: no, 1: yes)	How would you rate your current general health status? -- Poor (0: no, 1: yes)
	During the past 12 months, about how often did you eat staple foods other than rice and wheat (corn, millet etc.)? -- Never/rarely (0: no, 1:yes)	During the past 12 months, about how often did you eat wheat? -- Monthly (0: no, 1: yes)		How would rate your current general health status compared to someone of your own age? -- Better (0: no, 1: yes)
	About how often do you have bowel movements each week? -- Less than 3 times a week (0: no, 1:yes)	During the past 12 months, about how often did you eat wheat? -- Never/rarely (0: no, 1:yes)		How would rate your current general health status compared to someone of your own age? -- Worse (0: no, 1: yes)
	How often do your gums bleed when you brush your teeth? -- Sometimes (0: no, 1:yes)	During the past 12 months, about how often did you eat staple foods other than rice and wheat (corn, millet etc.)? -- Daily (0: no, 1: yes)		How would rate your current general health status compared to someone of your own age? -- Don't know (0: no, 1: yes)
	How often do your gums bleed when you brush your teeth? -- Brush teeth rarely or never (0: no, 1:yes)	During the past 12 months, about how often did you eat staple foods other than rice and wheat (corn, millet etc.)? -- 4-6 days per week (0: no, 1: yes)		During the past 12 months, about how often did you eat rice? -- Daily (0: no, 1: yes)
		During the past 12 months, about how often did you eat staple foods other than rice and wheat (corn, millet etc.)? -- 1-3 days per week (0: no, 1: yes)		During the past 12 months, about how often did you eat rice? -- 4-6 days per week (0: no, 1: yes)
		During the past 12 months, about how often did you eat staple foods other than rice and wheat (corn, millet etc.)? -- Monthly (0: no, 1: yes)		During the past 12 months, about how often did you eat rice? -- 1-3 days per week (0: no, 1: yes)
		How often do your gums bleed when you brush your teeth? -- Sometimes (0: no, 1:yes)		During the past 12 months, about how often did you eat wheat? -- Daily (0: no, 1: yes)
		How often do your gums bleed when you brush your teeth? -- Brush teeth rarely or never (0: no, 1:yes)		During the past 12 months, about how often did you eat wheat? -- 4-6 days per week (0: no, 1: yes)
				During the past 12 months, about how often did you eat wheat? -- Monthly (0: no, 1: yes)
				During the past 12 months, about how often did you eat wheat? -- Never/rarely (0: no, 1:yes)
				During the past 12 months, about how often did you eat staple foods other than rice and wheat (corn, millet etc.)? -- Daily (0: no, 1: yes)
				During the past 12 months, about how often did you eat staple foods other than rice and wheat (corn, millet etc.)? -- 4-6 days per week (0: no, 1: yes)
				During the past 12 months, about how often did you eat staple foods other than rice and wheat (corn, millet etc.)? -- 1-3 days per week (0: no, 1: yes)
				During the past 12 months, about how often did you eat staple foods other than rice and wheat (corn, millet etc.)? -- Monthly (0: no, 1: yes)
				About how often do you have bowel movements each week? -- Less than 3 times a week (0: no, 1:yes)
				How often do your gums bleed when you brush your teeth? -- Sometimes (0: no, 1:yes)
				How often do your gums bleed when you brush your teeth? -- Brush teeth rarely or never (0: no, 1:yes)

## Sheet: Options
Sex	Prediction	Model	Geographic Area
Male	9Yr Total Stroke Risk	2017 FSRP (Uncalibrated)	N/A
Female	9Yr Ischemic Stroke Risk	FSRP Inputs (Recalibrated - Aggregate CKB Baseline)	N/A
	9Yr Hemorrhagic Stroke Risk	FSRP Inputs (Recalibrated and Refitted - Aggregate CKB Baseline)	N/A
		FSRP Inputs (Recalibrated - Area-specific CKB Baselines)	Qingdao (Urban)	Harbin (Urban)	Haikou (Urban)	Suzhou (Urban)	Liuzhou (Urban)	Sichuan (Rural)	Gansu (Rural)	Henan (Rural)	Zhejiang (Rural)	Hunan (Rural)
		FSRP Inputs (Recalibrated and Refitted - Area-specific CKB Baselines)	Qingdao (Urban)	Harbin (Urban)	Haikou (Urban)	Suzhou (Urban)	Liuzhou (Urban)	Sichuan (Rural)	Gansu (Rural)	Henan (Rural)	Zhejiang (Rural)	Hunan (Rural)
		Expanded Model with CKB Inputs	Qingdao (Urban)	Harbin (Urban)	Haikou (Urban)	Suzhou (Urban)	Liuzhou (Urban)	Sichuan (Rural)	Gansu (Rural)	Henan (Rural)	Zhejiang (Rural)	Hunan (Rural)
